# Supplementary material for: Comparison of Repeated Doses of C-kit-Positive Cardiac Cells versus a Single Equivalent Combined Dose in a Murine Model of Chronic Ischemic Cardiomyopathy
Source: MDPI journal article supplement (doi:10.3390/ijms22063145), 2021-03-19

# Suppl. Figure 1

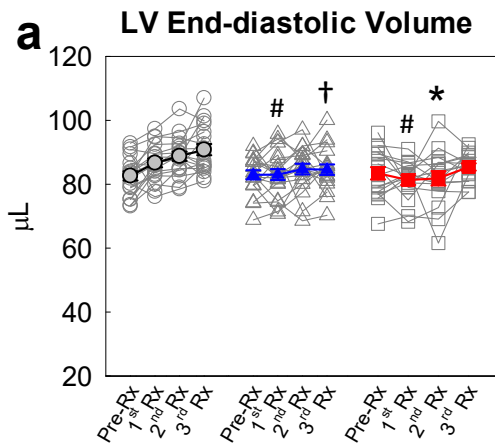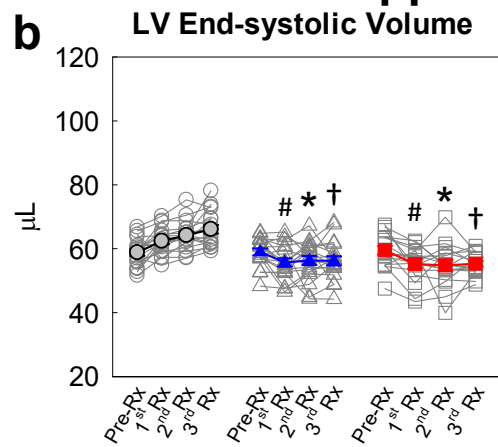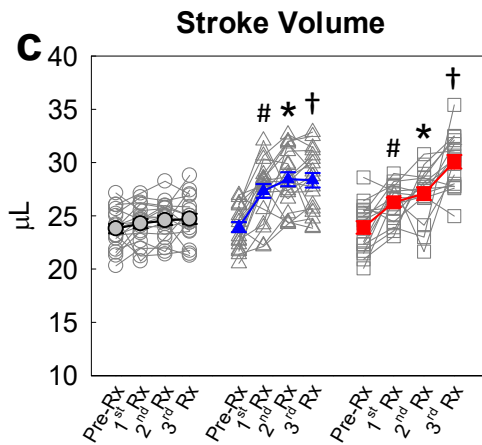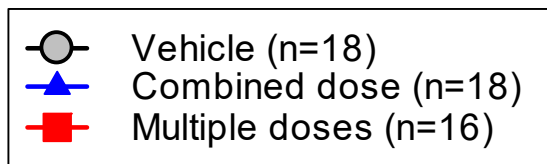

#  $P < 0.05$  vs. Vehicle 1<sup>st</sup> Rx

\*  $P < 0.05$  vs. Vehicle 2<sup>nd</sup> Rx

†  $P < 0.05$  vs. Vehicle 3<sup>rd</sup> Rx

§  $P < 0.05$  vs. Combined 3<sup>rd</sup> Rx

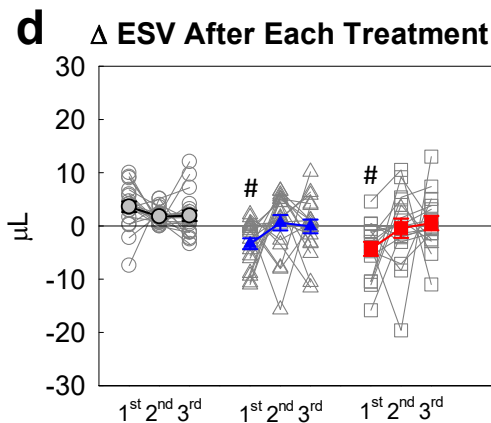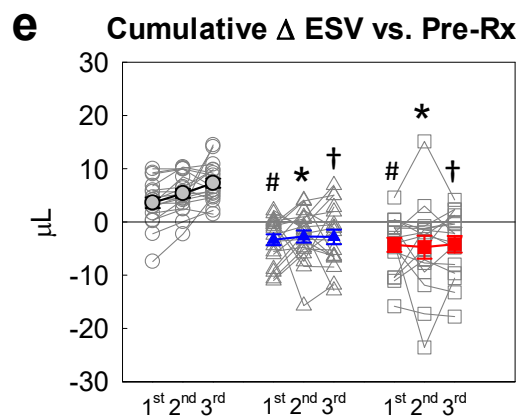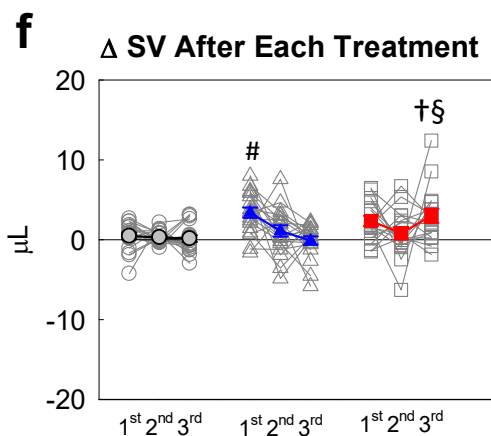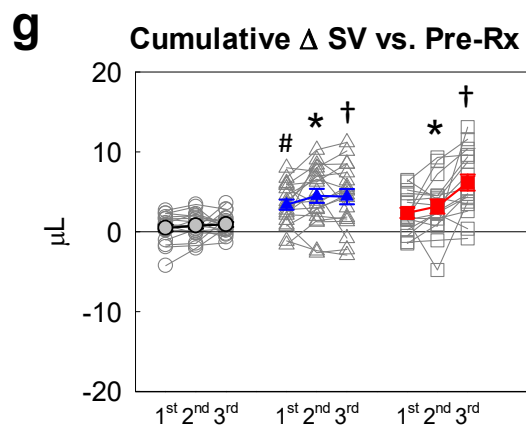

## Suppl. Figure 2

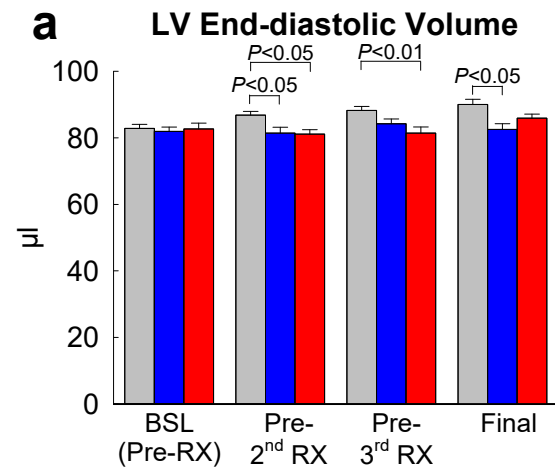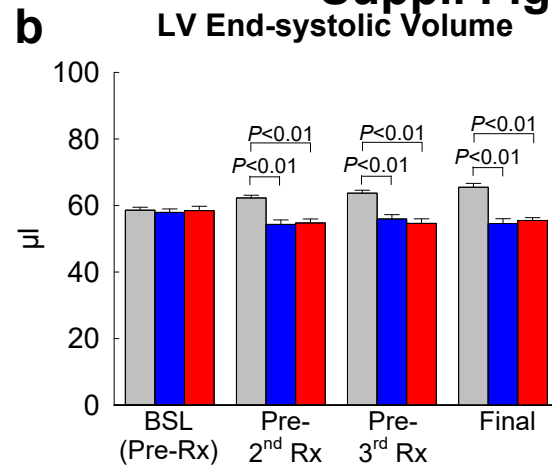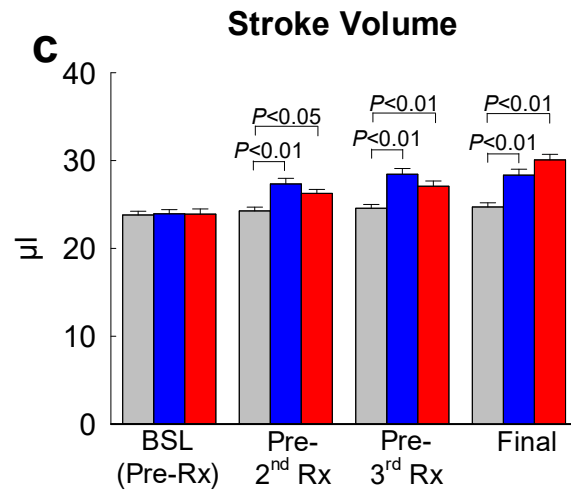

Vehicle (n=18)  
 Combined dose (n=18)  
 Multiple doses (n=16)

# P<0.05 vs. Vehicle 1<sup>st</sup> Rx

\* P<0.05 vs. Vehicle 2<sup>nd</sup> Rx

† P<0.05 vs. Vehicle 3<sup>rd</sup> Rx

§ P<0.05 vs. Combined 3<sup>rd</sup> Rx

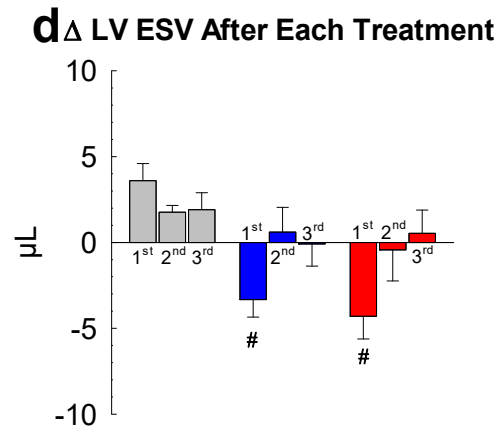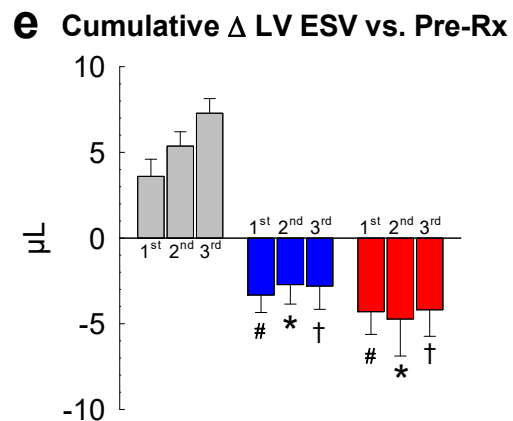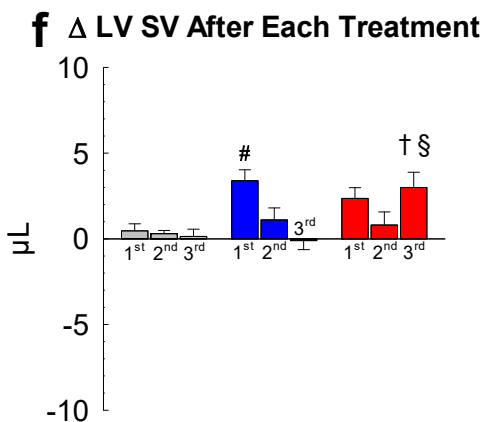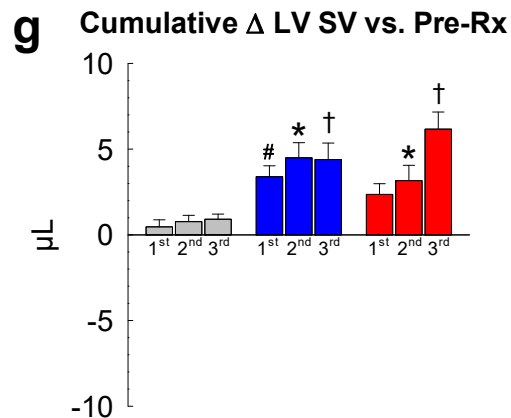

Supplement: s1 [file s1]
