# Supplementary material for: Comparison of Repeated Doses of C-kit-Positive Cardiac Cells versus a Single Equivalent Combined Dose in a Murine Model of Chronic Ischemic Cardiomyopathy
Source: MDPI journal article supplement (doi:10.3390/ijms22063145), 2021-03-19
Supplement: s1 [file s1]

**Supplementary Table 1. Exclusions**

|                                                     | <b>Vehicle</b> | <b>Combined-dose</b> | <b>Multiple-doses</b> |
|-----------------------------------------------------|----------------|----------------------|-----------------------|
| <b>Initial enrollment of mice for MI studies</b>    | 110            |                      |                       |
| <b>Death after MI (all deaths were within 48 h)</b> | 21             |                      |                       |
| <b>Excluded because EF &gt;30%</b>                  | 29             |                      |                       |
| <b>Mice assigned to group</b>                       | 18             | 20                   | 22                    |
| <b>Death after 1st infusion</b>                     | 0              | 2                    | 3                     |
| <b>Death after 2nd infusion</b>                     | 0              | 0                    | 2                     |
| <b>Death after 3rd infusion</b>                     | 0              | 0                    | 1                     |
| <b>Total mice included in final analysis</b>        | 18             | 18                   | 16                    |

EF, indicates ejection fraction; MI, indicates myocardial infarction.

**Supplementary Table 2.**

**A. Rectal Temperature and Heart Rate on the Day of Coronary Occlusion**

|                           | Pre-       | Occlusion  |            |            | Reperfusion |            |            |
|---------------------------|------------|------------|------------|------------|-------------|------------|------------|
|                           |            | 10 min     | 30 min     | 60 min     | 1 min       | 5 min      | 10 min     |
| <b><u>Temperature</u></b> |            |            |            |            |             |            |            |
| <b><u>(°C)</u></b>        |            |            |            |            |             |            |            |
| Vehicle                   | 37.1 ± 0.0 | 37.0 ± 0.0 | 37.0 ± 0.0 | 37.1 ± 0.0 | 37.1 ± 0.0  | 37.0 ± 0.0 | 37.1 ± 0.1 |
| Combined dose             | 37.1 ± 0.0 | 37.0 ± 0.0 | 37.1 ± 0.0 | 37.1 ± 0.0 | 37.1 ± 0.0  | 37.0 ± 0.0 | 37.1 ± 0.0 |
| Multiple doses            | 37.1 ± 0.0 | 37.1 ± 0.1 | 37.1 ± 0.0 | 37.1 ± 0.0 | 37.1 ± 0.0  | 37.1 ± 0.1 | 37.1 ± 0.0 |
| <b><u>Heart rate</u></b>  |            |            |            |            |             |            |            |
| <b><u>(beats/min)</u></b> |            |            |            |            |             |            |            |
| Vehicle                   | 466 ± 10   | 451 ± 7    | 464 ± 11   | 496 ± 13   | 508 ± 10    | 532 ± 14   | 546 ± 14   |
| Combined dose             | 452 ± 12   | 465 ± 16   | 474 ± 12   | 479 ± 8    | 517 ± 20    | 501 ± 11   | 502 ± 12   |
| Multiple doses            | 455 ± 8    | 449 ± 7    | 476 ± 12   | 498 ± 11   | 503 ± 6     | 509 ± 9    | 508 ± 17   |

A. Measurements of rectal temperature and heart rate were taken before the 60-min coronary occlusion (pre-occlusion), at 10, 30, and 60 min into the 60-min occlusion, and at 1, 5, and 10 min after reperfusion. Rectal temperature was continuously monitored and carefully controlled throughout the experiment, as detailed in the text. Data are means ± SEM.

**B. Rectal Temperature and Heart Rate on the Days of the Echocardiogram**

|                                      | Pre-Rx 1<br>(BSL) | Pre-Rx 2   | Pre-Rx 3   | Final Echo |
|--------------------------------------|-------------------|------------|------------|------------|
| <b><u>Temperature (°C)</u></b>       |                   |            |            |            |
| Vehicle                              | 37.4 ± 0.1        | 37.7 ± 0.1 | 37.7 ± 0.1 | 37.6 ± 0.1 |
| Combined dose                        | 37.5 ± 0.1        | 37.8 ± 0.1 | 37.5 ± 0.1 | 37.7 ± 0.1 |
| Multiple doses                       | 37.3 ± 0.1        | 37.6 ± 0.1 | 37.6 ± 0.1 | 37.8 ± 0.2 |
| <b><u>Heart rate (beats/min)</u></b> |                   |            |            |            |
| Vehicle                              | 522 ± 7           | 522 ± 11   | 550 ± 9    | 494 ± 10   |
| Combined dose                        | 516 ± 11          | 535 ± 9    | 551 ± 11   | 503 ± 12   |
| Multiple doses                       | 506 ± 7           | 534 ± 14   | 547 ± 7    | 523 ± 12   |

B. Measurements of rectal temperature and heart rate were taken during the echocardiographic studies. First, second, and third Rx indicates first, second, and third treatment. Data are means ± SEM.

### C. Temperature and Heart Rate on the Day of the Hemodynamics Study

|                | Temperature (°C) | Heart rate<br>(beats/min) |
|----------------|------------------|---------------------------|
| Vehicle        | 37.2 ± 0.03      | 466 ± 10                  |
| Combined dose  | 37.3 ± 0.03      | 460 ± 12                  |
| Multiple doses | 37.2 ± 0.02      | 476 ± 14                  |

C. Measurements of rectal temperature and heart rate were taken after LV catheterization was stabilized for 30 minutes during hemodynamics studies. Data are means ± SEM.

**Supplementary Table 3.**

**Body Weight on the Days of Coronary Occlusion and Echocardiograms**

|                                | Naive<br>(n=6) | Vehicle<br>(n=18) | Combined dose<br>(n=18) | Multiple doses<br>(n=16) |
|--------------------------------|----------------|-------------------|-------------------------|--------------------------|
| <b><u>Body weight(g)</u></b>   |                |                   |                         |                          |
| Day of Occlusion               |                | 21.8 ± 0.2        | 23.3 ± 0.4 <sup>#</sup> | 23.2 ± 0.3 <sup>#</sup>  |
| Pre-Rx 1 (BSL)                 |                | 25.3 ± 0.4        | 25.5 ± 0.4              | 25.9 ± 0.5               |
| Pre-Rx 2                       |                | 25.3 ± 0.4        | 25.9 ± 0.3              | 26.2 ± 0.4               |
| Pre-Rx 3                       |                | 25.6 ± 0.5        | 26.1 ± 0.4              | 25.2 ± 0.4               |
| Final Echo                     | 24.8 ± 0.7     | 23.8 ± 0.6        | 26.2 ± 0.4 <sup>#</sup> | 26.3 ± 0.3 <sup>#</sup>  |
| <b><u>Δ Body Weight(g)</u></b> |                |                   |                         |                          |
| Final-Pre-Rx 1                 |                | -1.5 ± 0.8        | 0.7 ± 0.3 <sup>#</sup>  | 0.4 ± 0.4                |
| Final-Pre-Rx 2                 |                | -1.5 ± 0.6        | 0.3 ± 0.2 <sup>#</sup>  | 0.3 ± 0.4 <sup>#</sup>   |
| Final-Pre-Rx 3                 |                | -1.8 ± 0.6        | 0.1 ± 0.4 <sup>#</sup>  | 1.1 ± 0.4 <sup>#</sup>   |

Measurements of body weight taken on the day of 60-minute coronary occlusion and on the day of each echocardiographic study. Echocardiograms were performed prior to the first treatment (3 months after 60-minute coronary occlusion), and 5 weeks after each treatment. Rx indicates treatment. <sup>#</sup> P<0.05 vs. Vehicle. Data are means ± SEM.

**Supplementary Table 4.**  
**Collagen in Left Ventricle**

|                                              | <b>Vehicle<br/>(n=11)</b> | <b>Combined<br/>dose<br/>(n=11)</b> | <b>Multiple<br/>doses<br/>(n=10)</b> |
|----------------------------------------------|---------------------------|-------------------------------------|--------------------------------------|
| CV (mm <sup>3</sup> ) in Risk Region         | 16.7 ± 1.6*               | 16.2 ± 1.3*                         | 15.4 ± 1.8*                          |
| CV (mm <sup>3</sup> ) in Noninfarcted Region | 4.4 ± 1.0                 | 2.3 ± 0.8                           | 2.6 ± 0.3                            |
| CVF (%) in Risk Region                       | 37.3 ± 2.0*               | 37.2 ± 1.4*                         | 37.2 ± 1.9*                          |
| CVF (%) in Noninfarcted Region               | 4.9 ± 0.9                 | 3.6 ± 0.3                           | 4.4 ± 0.4                            |

Comparison of collagen volume and collagen volume fraction among 65-days post-MI with/without cell therapy. CV: Collagen Volume; CVF: Collagen Volume Fraction. \*P<0.05 vs. Noninfarcted Region. Data are means ± SEM.
